# Supplementary material
Source: PubMed Central journal article supplement (PMC4636057)
Supplement: NIHMS65213-supplement-Table_S1.pdf [file NIHMS65213-supplement-Table_S1.pdf]

Table S1:

## Demographic, clinical and serological characterization of HDM-allergic patients suffering from AD

| ID   | Age (years) | Sex | Asthma | Rhinitis | Scorad | total IgE [kU/L] | sIgE Dp [kU/L] | IgE-reactivity |          |          |          |           |           |           |           |           |           |
|------|-------------|-----|--------|----------|--------|------------------|----------------|----------------|----------|----------|----------|-----------|-----------|-----------|-----------|-----------|-----------|
|      |             |     |        |          |        |                  |                | rDer p 1       | rDer p 2 | rDer p 5 | rDer p 7 | rDer p 10 | rDer p 11 | rDer p 14 | rDer p 18 | rDer p 21 | rDer p 23 |
| 1.   | 11          | M   | yes    | no       | 46.5   | 4970             | >100           | x              | x        |          |          | x         | x         |           | x         |           | x         |
| 2.   | 12          | M   | no     | no       | 18.6   | 218              | 21.7           | x              | x        |          |          |           | x         |           |           | x         |           |
| 3.   | 12          | F   | yes    | yes      | 27.6   | 117              | 11.5           |                | x        |          |          |           | x         |           |           |           | x         |
| 4.   | 12          | M   | yes    | yes      | 70.7   | 9796             | >100           | x              | x        | x        |          | x         | x         | x         | x         | x         | x         |
| 5.   | 12          | F   | no     | no       | 26.7   | 285              | 14             | x              | x        |          |          |           | x         |           |           |           | x         |
| 6.   | 12          | F   | yes    | no       | 31.89  | 1515             | >100           | x              | x        | x        | x        | x         | x         |           | x         | x         | x         |
| 7.   | 12          | M   | yes    | yes      | 54.5   | 407              | >100           | x              | x        |          |          |           |           |           |           |           | x         |
| 8.   | 12          | M   | yes    | yes      | 10.6   | 367              | 8.81           |                | x        |          |          |           |           |           |           |           |           |
| 9.   | 12          | F   | yes    | yes      | 19.8   | 1514             | >100           | x              | x        | x        |          |           |           |           |           |           | x         |
| 10.  | 12          | M   | no     | yes      | 15.9   | 509              | 14.7           |                | x        |          |          |           |           |           |           |           |           |
| 11.  | 12          | M   | yes    | yes      | 24     | 700              | 59.9           | x              | x        |          |          |           |           |           |           |           | x         |
| 12.  | 12          | M   | no     | yes      | 2      | 408              | 2.27           | x              |          |          |          |           |           |           |           |           |           |
| 13.  | 13          | M   | yes    | yes      | 10.6   | 1775             | >100           | x              | x        | x        |          |           | x         |           |           | x         | x         |
| 14.  | 13          | F   | yes    | yes      | 25.8   | 421              | 10.7           |                | x        | x        |          |           | x         |           |           |           | x         |
| 15.  | 13          | F   | yes    | no       | 0      | 20.4             | 27.7           | x              | x        |          |          |           |           |           |           |           | x         |
| 16.  | 13          | M   | yes    | yes      | 34     | 210              | 61.7           | x              | x        | x        | x        |           |           |           |           | x         | x         |
| 17.  | 13          | M   | yes    | yes      | 35     | 948              | >100           | x              | x        |          |          |           | x         | x         | x         |           | x         |
| 18.  | 13          | F   | yes    | yes      | 0      | 559              | 23.5           |                | x        |          |          |           | x         |           |           |           | x         |
| 19.  | 13          | F   | no     | no       | 0      | 1585             | >100           | x              | x        | x        |          |           |           |           |           |           | x         |
| 20.  | 13          | M   | no     | no       | 49.6   | 1774             | >100           | x              | x        | x        | x        |           | x         |           |           | x         | x         |
| 21.  | 13          | F   | yes    | no       | 45.1   | 278              | 15.1           | x              | x        |          |          | x         |           |           |           |           | x         |
| 22.  | 13          | M   | yes    | no       | 10.6   | 1851             | 2.24           | x              | x        |          |          |           | x         |           |           |           |           |
| 23.  | 13          | F   | yes    | yes      | 17.1   | 650              | 3.08           | x              |          |          |          |           |           |           |           |           |           |
| 24.  | 14          | M   | yes    | yes      | 10.6   | 571              | 14             |                | x        |          |          |           |           |           |           |           |           |
| 25.  | 14          | M   | yes    | no       | 0      | 353              | 83             |                | x        |          |          |           |           |           |           |           | x         |
| 26.  | 14          | F   | no     | no       | 10.6   | 459              | 11.2           |                | x        |          |          |           |           |           |           |           | x         |
| 27.  | 14          | F   | no     | no       | 35.4   | 531              | >100           | x              | x        |          |          |           |           |           |           |           | x         |
| 28.  | 14          | M   | no     | yes      | 20.9   | 721              | 78.3           |                | x        | x        |          |           |           |           |           | x         |           |
| 29.  | 14          | M   | no     | no       | 10.9   | 450              | >100           | x              | x        | x        | x        |           |           |           |           | x         | x         |
| 30.  | 14          | F   | no     | no       | 26.3   | 349              | >100           | x              | x        |          |          |           |           |           |           |           | x         |
| 31.  | 14          | M   | yes    | yes      | 11.3   | 1308             | >100           | x              | x        |          |          | x         |           |           |           |           |           |
| 32.  | 14          | M   | yes    | no       | 0      | 256              | 8.6            | x              | x        |          |          |           |           |           |           | x         | x         |
| 33.  | 14          | F   | yes    | yes      | 35     | 1131             | >100           | x              | x        |          |          |           |           |           |           | x         | x         |
| 34.  | 14          | M   | no     | yes      | 10.9   | 104              | 93.1           | x              | x        | x        | x        |           |           |           |           |           | x         |
| 35.  | 14          | M   | yes    | yes      | 36.79  | 661              | >100           | x              | x        | x        |          |           |           |           |           | x         | x         |
| 36.  | 14          | M   | no     | no       | 30.2   | 277              | 6.29           | x              | x        |          |          |           | x         | x         |           |           |           |
| 37.  | 14          | M   | yes    | yes      | 38.4   | 1890             | >100           | x              | x        |          |          |           | x         |           |           |           | x         |
| 38.  | 14          | F   | yes    | no       | 31.3   | 94.9             | 30.3           | x              | x        |          |          |           |           |           |           |           | x         |
| 39.  | 14          | F   | yes    | no       | 10.6   | 79.5             | 1.46           | x              | x        |          |          |           | x         | x         |           |           | x         |
| 40.  | 14          | M   | no     | yes      | 52.9   | 658              | 0.782          |                |          |          |          |           | x         |           |           |           | x         |
| 41.  | 14          | M   | no     | no       | 33     | 208              | 2.14           | x              | x        | x        |          |           | x         |           |           |           | x         |
| 42.  | 15          | M   | no     | yes      | 23     | 2000             | >100           | x              | x        | x        |          | x         | x         |           |           | x         | x         |
| 43.  | 15          | M   | yes    | yes      | 31.5   | 96.4             | 45.8           | x              | x        | x        | x        |           |           |           |           | x         | x         |
| 44.  | 15          | M   | yes    | yes      | 41.7   | 2000             | >100           | x              | x        |          | x        | x         | x         | x         |           |           | x         |
| 45.  | 15          | F   | no     | yes      | 7.2    | 728              | >100           | x              | x        |          |          |           | x         |           |           |           | x         |
| 46.  | 15          | F   | yes    | yes      | n d    | 628              | >100           | x              | x        |          |          |           | x         |           |           |           | x         |
| 47.  | 15          | F   | yes    | no       | 67.2   | 966              | >100           | x              | x        |          |          |           | x         |           |           |           | x         |
| 48.  | 15          | M   | no     | no       | 20     | 644              | >100           | x              | x        |          |          |           | x         |           |           |           | x         |
| 49.  | 15          | F   | no     | no       | 20     | 98.4             | 56.5           | x              | x        |          |          |           | x         | x         |           |           | x         |
| 50.  | 15          | M   | no     | yes      | 54.9   | 2000             | >100           | x              | x        |          |          |           | x         | x         |           |           | x         |
| 51.  | 15          | M   | no     | yes      | 54.9   | 2000             | >100           | x              | x        |          |          |           |           |           |           |           | x         |
| 52.  | 15          | M   | no     | no       | 30.4   | 1479             | >100           | x              | x        | x        | x        | x         | x         |           | x         |           | x         |
| 53.  | 15          | F   | no     | yes      | 25.2   | 5544             | 46.4           |                | x        | x        | x        | x         | x         | x         | x         |           | x         |
| 54.  | 15          | F   | yes    | yes      | 47.4   | 578              | >100           | x              | x        | x        | x        | x         | x         | x         | x         |           | x         |
| 55.  | 15          | F   | no     | yes      | 21.4   | 107              | 9.29           | x              | x        |          |          |           |           |           |           |           | x         |
| 56.  | 15          | M   | no     | yes      | 41.2   | 328              | 30.1           | x              | x        |          |          |           | x         |           |           |           | x         |
| 57.  | 15          | F   | no     | yes      | 31     | 54.3             | 2.51           |                | x        |          |          |           |           |           |           |           | x         |
| 58.  | 15          | F   | no     | yes      | 33.3   | 2106             | 0.912          |                | x        |          |          |           | x         | x         | x         |           | x         |
| 59.  | 16          | M   | no     | no       | 23.5   | 1139             | >100           | x              | x        | x        | x        | x         | x         | x         | x         | x         | x         |
| 60.  | 16          | F   | yes    | yes      | 35.7   | 2000             | >100           | x              | x        | x        |          | x         | x         | x         | x         |           | x         |
| 61.  | 16          | M   | no     | yes      | 31.6   | 412              | 92.6           | x              | x        | x        | x        |           |           |           |           | x         | x         |
| 62.  | 16          | F   | no     | n d      | 256    | 30.2             |                |                |          |          |          |           |           |           |           | x         |           |
| 63.  | 16          | F   | no     | no       | 18.8   | 604              | 6.71           | x              | x        | x        |          | x         |           |           |           |           |           |
| 64.  | 16          | F   | yes    | yes      | 0      | 2000             | >100           | x              | x        | x        | x        |           | x         | x         | x         | x         | x         |
| 65.  | 16          | M   | yes    | yes      | 15.02  | 197              | 40             | x              | x        | x        |          |           | x         |           |           |           | x         |
| 66.  | 16          | F   | no     | no       | 47.9   | 1584             | >100           | x              | x        |          |          |           | x         |           |           |           | x         |
| 67.  | 16          | F   | yes    | yes      | 19.3   | 2524             | >100           | x              | x        | x        | x        |           | x         |           |           |           | x         |
| 68.  | 16          | M   | yes    | yes      | 24.6   | 466              | 28.5           | x              | x        |          |          |           |           |           |           |           | x         |
| 69.  | 16          | F   | yes    | yes      | 36.29  | 510              | >100           |                |          |          |          |           | x         |           |           |           | x         |
| 70.  | 16          | M   | yes    | yes      | 10.6   | 270              | >100           | x              | x        | x        |          |           |           |           |           |           | x         |
| 71.  | 16          | F   | no     | yes      | 39.29  | 2000             | 26.2           | x              | x        |          |          | x         | x         | x         |           |           | x         |
| 72.  | 16          | M   | yes    | yes      | 31.89  | 611              | >100           | x              | x        |          |          |           | x         |           |           |           | x         |
| 73.  | 16          | M   | no     | no       | 67.3   | 587              | >100           | x              | x        | x        | x        |           | x         | x         |           |           | x         |
| 74.  | 16          | F   | no     | yes      | 23.7   | 211              | 52.2           | x              | x        |          |          |           |           |           |           |           | x         |
| 75.  | 16          | M   | yes    | yes      | 23.3   | 5538             | >100           | x              | x        | x        | x        | x         | x         | x         | x         |           | x         |
| 76.  | 16          | M   | yes    | yes      | 39     | 3770             | >100           | x              | x        | x        |          | x         | x         | x         |           |           | x         |
| 77.  | 16          | F   | no     | yes      | 35.1   | 21.8             | 3.09           | x              | x        |          |          |           |           |           |           |           | x         |
| 78.  | 16          | M   | no     | yes      | 10.6   | 717              | 3.62           |                |          |          |          | x         |           |           |           |           | x         |
| 79.  | 17          | M   | no     | no       | 38.4   | 2000             | >100           | x              | x        | x        | x        |           | x         | x         | x         |           | x         |
| 80.  | 17          | F   | yes    | yes      | 21.9   | 243              | 16.5           | x              | x        |          |          | x         |           |           |           |           | x         |
| 81.  | 17          | M   | no     | yes      | 19.9   | 847              | 11.1           | x              | x        |          |          | x         | x         |           |           |           | x         |
| 82.  | 17          | F   | no     | no       | 31.2   | 336              | >100           | x              | x        |          |          |           | x         |           |           |           | x         |
| 83.  | 17          | F   | no     | yes      | 12.6   | 724              | 14.2           | x              | x        |          |          |           |           |           |           |           | x         |
| 84.  | 17          | F   | yes    | yes      | 51.1   | 2000             | >100           | x              | x        | x        |          | x         | x         | x         | x         | x         | x         |
| 85.  | 17          | F   | yes    | yes      | 58.3   | 172              | 44.9           | x              | x        | x        |          |           | x         | x         |           |           | x         |
| 86.  | 17          | M   | no     | yes      | 71.5   | 2000             | >100           | x              | x        |          |          | x         | x         |           |           | x         | x         |
| 87.  | 17          | M   | no     | yes      | 6.1    | 249              | 5.88           |                | x        |          |          |           |           |           |           |           |           |
| 88.  | 17          | F   | yes    | yes      | 41.9   | 1400             | 18.1           | x              | x        |          |          |           |           |           |           |           | x         |
| 89.  | 17          | F   | no     | no       | 35.5   | 458              | 1.1            | x              | x        |          |          | x         |           |           |           |           |           |
| 90.  | 17          | F   | no     | no       | 32.2   | 2266             | 8.37           |                | x        | x        |          | x         | x         |           |           |           | x         |
| 91.  | 18          | F   | no     | yes      | 36.8   | 244              | >100           | x              | x        | x        |          |           |           |           |           |           | x         |
| 92.  | 18          | F   | yes    | yes      | 29.4   | 300              | >100           | x              | x        | x        |          |           |           |           |           |           | x         |
| 93.  | 18          | F   | no     | yes      | 36.6   | 735              | >100           | x              | x        | x        |          |           | x         | x         | x         |           | x         |
| 94.  | 18          | M   | no     | no       | 41.7   | 506              | >100           | x              | x        |          |          |           |           |           |           |           | x         |
| 95.  | 18          | F   | yes    | yes      | 29     | 122              | >100           | x              | x        | x        | x        |           |           |           |           |           | x         |
| 96.  | 18          | F   | yes    | yes      | 37.5   | 469              | >100           | x              | x        |          |          |           |           |           |           |           | x         |
| 97.  | 18          | F   | no     | yes      | 39.9   | 2000             | >100           | x              | x        |          |          | x         | x         | x         |           |           | x         |
| 98.  | 18          | M   | no     | no       | 54.7   | 2936             | >100           | x              | x        |          |          | x         | x         |           | x         |           | x         |
| 99.  | 18          | M   | no     | yes      | 31     | 294              | 89.8           | x              | x        | x        |          |           | x         |           |           |           | x         |
| 100. | 18          | F   | yes    | yes      | 15.8   | 4048             | 91.6           | x              | x        |          |          | x         | x         | x         |           |           | x         |
